# Supplementary figures and images for: Adhesion of a nematic elastomer cylinder
Source: Royal Society of Chemistry journal article supplement (doi:10.1039/d4sm00606b), 2024-10-03

# Mesh convergence

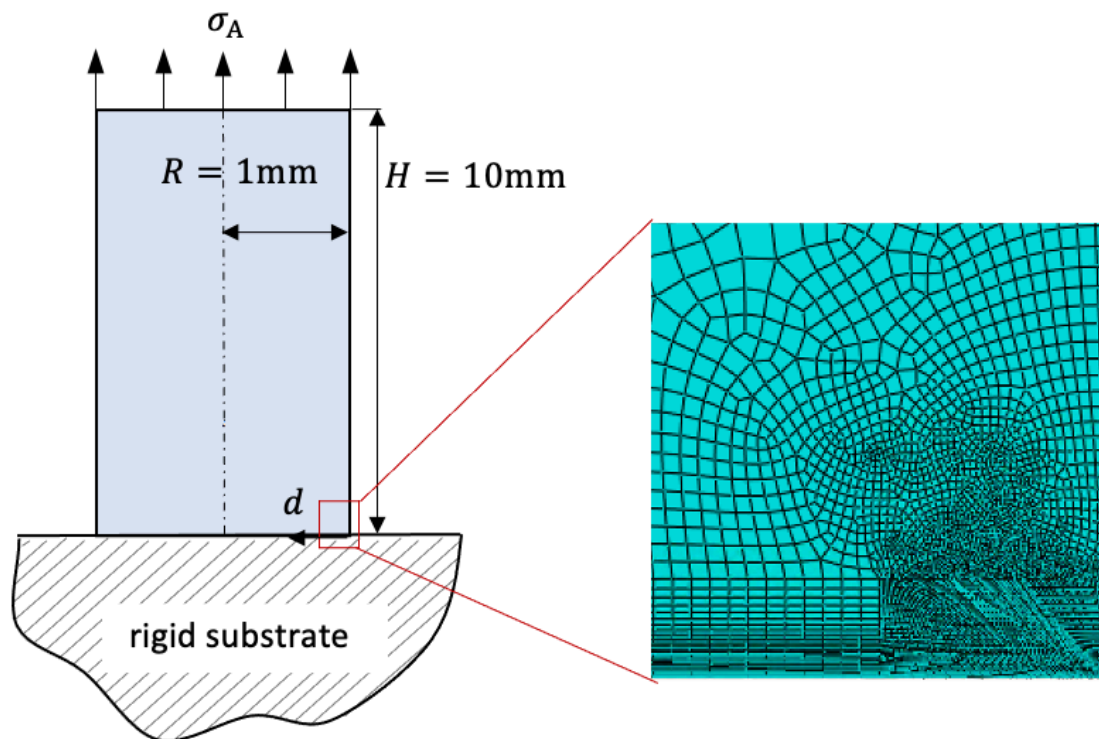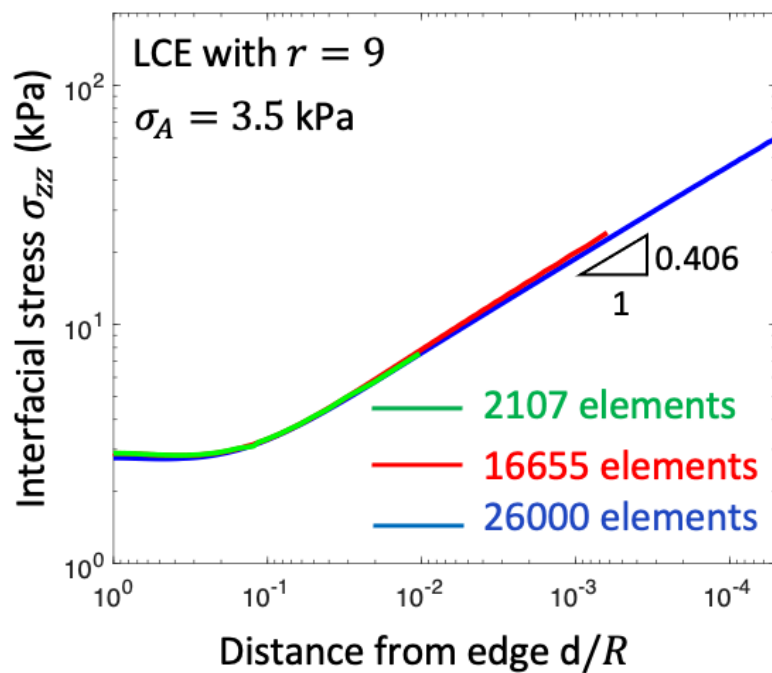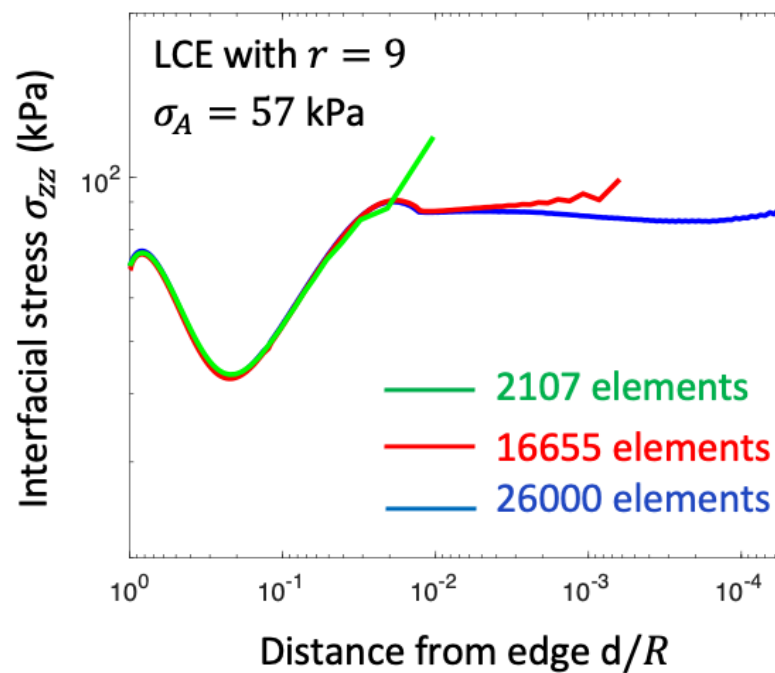

Supplement: d4sm00606b1.pdf [file d4sm00606b1.pdf]
